# Supplementary material for: Common Household Chemicals and the Allergy Risks in Pre-School Age Children
Source: PubMed Central journal article supplement (PMC2956675; doi:10.1371/journal.pone.0013423), 2010-10-18

Figure S4. Comparison of indoor air geometric mean concentrations for VOCs found in at least 80% (see Figure 2) in the homes in both the DBH and the EXPOLIS study. (Pearson correlation  $R^2=0.612$ ,  $p=0.022$ ).

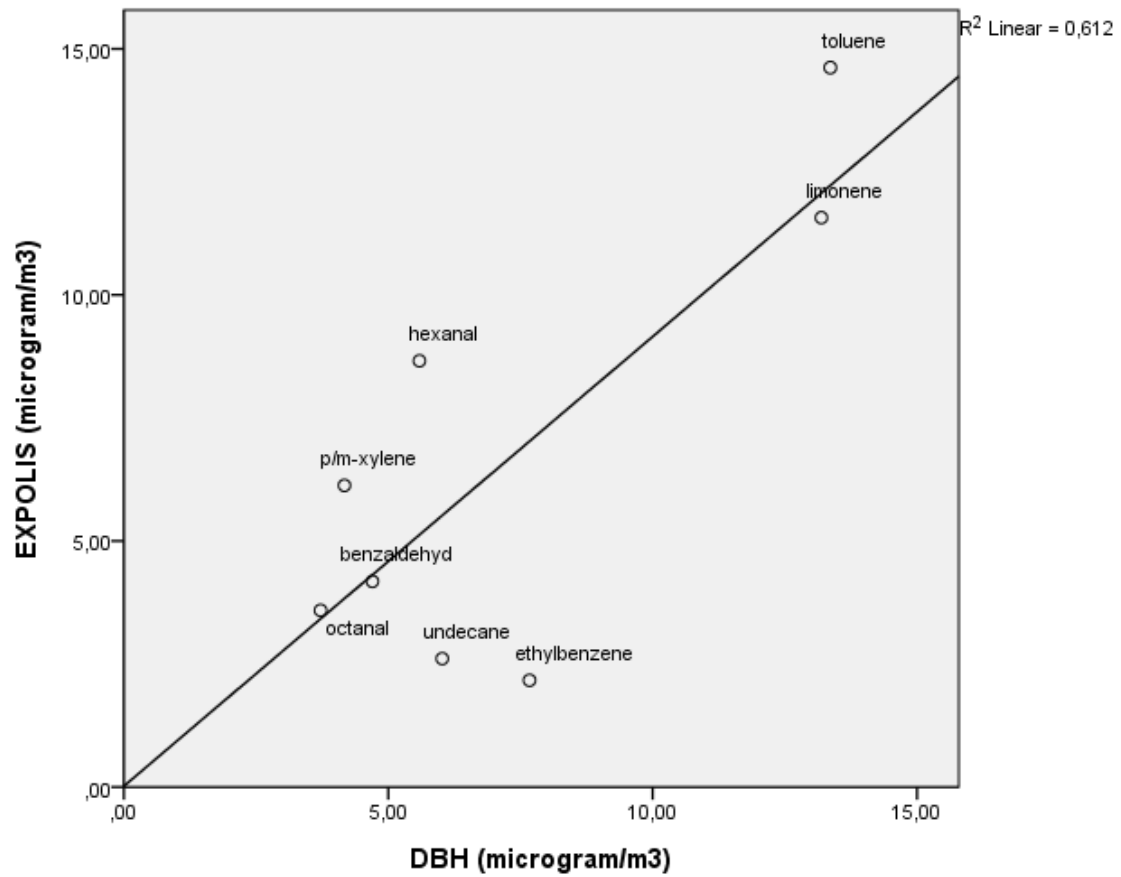

Supplement: pone.0013423.s004.pdf [file pone.0013423.s004.pdf]
